# Supplementary material
Source: Elsevier journal article supplement (https://www.sciencedirect.com/science/article/pii/S0210570522000851)
Supplement: mmc1 [file S0210570522000851:mmc1.doc]

**Annexo 1:** Instrucciones para utilitzar correctamente la Escala Clínica de Fragilidad (CFS)


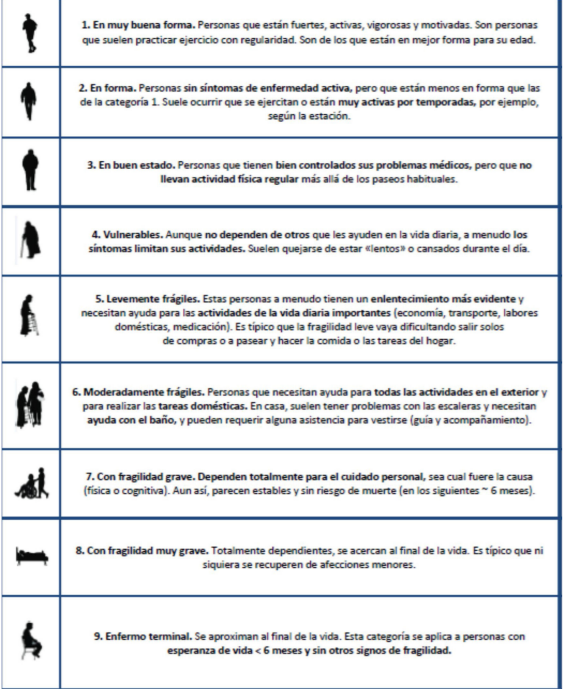


La Escala Clínica de Fragilidad (ECF) fue diseñada originalmente para sintetizar los resultados de una evaluación geriátrica exhaustiva, y actualmente se utiliza como una herramienta de triaje en el momento de tomar decisiones clínicas importantes; por ello, su uso correcto es fundamental.

**Como utilitzar la ECF:**

1. **Todo está en la situación basal**
   - Si la persona a evaluar está gravemente enferma por un problema agudo, tome en cuenta cómo se encontraba hace dos semanas, no su estado actual.
2. **Realice una historia clínica completa**
   - La ECF es una herramienta de evaluación clínica objetiva, por lo que la fragilidad se debe percibir, describir y medir, no adivinar
3. **Confíe, pero compruebe**
   - Lo que la persona a evaluar le dice es importante, pero debe ser corroborado con los familiares o cuidadores. La ECF es una herramienta basada en el juicio clínico, por lo que usted debe integrar lo que escucha, lo que observa, y lo que le dicta su propia experiencia clínica con adultos mayores.
4. **Sólo para mayores de 65**
   - La ECF no está validada en personas menores de 65 años, ni aquellos con discapacidades de un solo sistema. Sin embargo, documentar cómo una persona se mueve, cómo funciona y cómo percibe su salud puede ayudar a crear una evaluación individual de fragilidad
5. **Enfermos terminales (ECF 9)**
   - Para las personas que parecen estar muy cerca de la muerte, se tomará en cuenta el problema actual (la cercanía con la muerte) por encima de la línea de base.
6. **Los problemas médicos no aumentan automáticamente el puntaje a ECF 3**
   - Una persona a quien no afectan sus síntomas y cuyos problemas médicos no le hacen sentirse con limitaciones, puede ser clasificada como ECF 1 o 2 siempre y cuando sea activa e independiente.
7. **Recuerde: “vulnerable” (ECF 4)**
   - Las personas en esta categoría no son dependientes (aunque pueden necesitar ayuda con tareas complejas en el hogar), pero se quejan a menudo de “sentirse más lentas o torpes”. Están en proceso de volverse sedentarios, con poco control de sus síntomas.
8. **La demencia no limita el uso de la ECF**
   - El deterioro funcional de las personas que viven con demencia sigue un patrón similar al de la fragilidad: la demencia leve, moderada y grave se equiparan con los niveles ECF 5,6 y 7 respectivamente. Si no se conoce el nivel de demencia, siga la clasificación estándar ECF.
9. **Insista en los cambios en la función**
   - Cuando evalúe actividades instrumentales de la vida diaria (como cocinar, administrar las finanzas personales o llevar la casa) concéntrese en los cambios en la función. Una persona que siempre ha dependido de otra persona para llevar a cabo una actividad particular no debe considerarse dependiente para esa actividad si nunca ha tenido que realizarla y tal vez no sepa cómo hacerla.

# ANNEXO 2: ÍNDICE FRÀGIL VIG

**COMENTARIOS Y RECOMENACIONES GENERALES**

- La **información necesaria** para realizar el IF-VIG se obtiene a partir de una **anamnesis** básica con **el paciente y / o cuidador/es** principal/es, así como también de los **sistemas de información**. *Puesto que algunas variables se pueden obtener a través de la revisión de la medicación habitual, hay que poner especial énfasis en la revisión de este apartado.*
- Si queremos conocer el grado de reserva de una
- persona, se recomienda contemplar las variables que hacen referencia a su **SITUACIÓN BASAL** previa a la aparición de un hipotético proceso intercurrente–. *En el caso de hospitalización, al menos 1 mes antes de la hospitalización y/o inicio del proceso intercurrente que motivó el ingreso.*
- Las **variables binarias**, se puntúan de manera que "0" indica ausencia y "1" presencia del déficit. *En caso de constatar* ***criterios de enfermedad crónica avanzada*** *(oncológica, respiratoria, cardiovascular, neurológica, hepática, renal) incluidas en el test NECPAL (Anexo 1) se adjudican 2 puntos y no 1.* Para las **variables ordinales** *(Actividades básicas de la vida diaria y Deterioro cognitivo)* se utilizan puntos de corte utilizados habitualmente en la práctica clínica. ▪ Se estima un **tiempo de administración** de entre 5-10 minutos

**ÍNDICE FRAGIL VIG:**

| DOMINI0 | | VARIABLE | DESCRIPCIÓN | | PUNTOS |  |
| --- | --- | --- | --- | --- | --- | --- |
| FUNCIONAL | AIVDs | Manejo del dinero | ¿Necesita ayuda para gestionar los asuntos económicos  (banco, tiendas, restaurantes) ? | Sí | 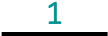  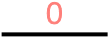 |  |
| No |  |
| Utilización del teléfono | ¿Necesita ayuda para utilitzar autónomamente el teléfono? | Sí | 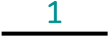 |  |
| No | 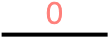 |  |
| Control de medicación | ¿Necesita ayuda para la preparación/administración de la medicación? | Sí | 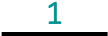 |  |
| No |  |
| ABVDs | Índice de Barthel (IB) | ¿No dependencia (IB ≥ 95) ? | | 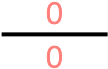 |  |
| ¿Dependencia leve-moderada (IB 90-65) ? | | 1 |  |
| ¿Dependencia moderada-grave (IB 60-25) ? | | 2 |  |
| ¿Dependencia absoluta (IB ≤20)? | | 3 |  |
| NUTRICIONAL | | Malnutrición | ¿Ha perdido ≥ 5% de peso en los últimos 6 meses? | Sí | 1 |  |
| No | 0 |  |
| COGNITIVO | | Grado de deterioro cognitivo | ¿Ausencia de deterioro cognitivo? | | 0 |  |
| ¿Deterioro cognitiu leve-moderado (equivalente a GDS ≤5)? | | 1 |  |
| ¿Deterioro cognitivo grave-muy grave (equivalente a GDS ≥ 6)? | | 2 |  |
| EMOCIONAL | | Síndrome depresivo | ¿Necesita de medicación antidepresiva? | Sí | 1 |  |
| No | 0 |  |
| Insomnio/ansiedad | ¿Necesita tratamoiento habitual con benzodiacepinas u otros psicofármacos de perfil sedante para el insomnio / ansiedad? | Sí | 1 |  |
| No | 0 |  |
| SOCIAL | | Vulnerabilidad social | ¿Existe percepción por parte de los profesionales de situación de vulnerabilidad social ? | Sí | 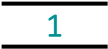  0 |  |
| No |  |
| SÍNDROMES GERIÁTRICOS | | Delirium | ¿En los últimos 6 meses, ha presentado *delirium* y/o trastorno de comportamiento, que haya requerido de neurolépticos? | Sí | 1 |  |
| No | 0 |  |
| Caídas | ¿En los últimos 6 meses, ha presentado ≥2 caídas o alguna caída que haya requerido de hospitalitzación? | Sí | 1 |  |
| No | 0 |  |
| Úlceras | ¿Presenta alguna úlcera (relacionada con la dependencia y/o vascular, de cualquier grado) y/o herida crónica? | Sí | 1 |  |
| No | 0 |  |
| Polifarmacia | ¿Habitualmente, toma ≥ 5 fármacos ? (no incluye fármacos  condicionales) | Sí | 1 |  |
| No | 0 |  |
| Disfagia | ¿ Se atraganta frecuentemente cuando come o bebe?  y/o en los últimos 6 meses, ha presentado alguna infección respiratoria por broncoaspiración ? | Sí | 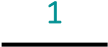 |  |
| No | 0 |  |
| SÍNTOMAS GRAVES | | Dolor | ¿Requiere de ≥ 2 analgésics convencionales y/o opiáceos mayores para el control del dolor? | Sí | 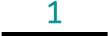  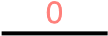 |  |
| No |  |
| Disnea | ¿La disnea basal le impide salir de casa y/o require de opiáceos habitualmente? | Sí | 1 |  |
| No | 0 |  |
| ENFERMEDADES | | Cáncer | ¿Tiene algún tipo de enfermedad oncológica activa? | Sí | 1 | 2* |
| No | 0 |  |
| Respiratorias | ¿Tiene algún tipo de enfermedad respiratoria crónica  (EPOC, neumopatía restrictiva,...)? | Sí | 1 | 2* |
| No | 0 |  |
| Cardíacas | ¿Tiene algún tipo de enfermedad cardíaca crónica  (Insuficiencia cardíaca, cardiopatia isquèmica, arrítmia)? | Sí | 1 | 2* |
| No | 0 |  |
| Neurológicas | ¿Tiene algún tipo de enfermedad neurodegenerativa (Parkinson, ELA, ,...) o antecedente de accidente vascular cerebral (isquémico o hemorrágico)? | Sí | 1 | 2* |
| No | 0 |  |
| Digestivas | ¿Tiene algún tipo de enfermedad digestiva crónica  (hepatopatia crónica, cirrosis, pancreatitis crónica, enfermedad inflamatoria intestinal,…)? | Sí | 1 | 2* |
| No | 0 |  |
| Renales | ¿Tiene insuficiencia renal crónica (FG < 60)? | Sí | 1 | 2* |
| No | 0 |  |
| **Índice Frágil-VIG** | | | | X /25 = | |  |

# RECOMENDACIONES ESPECÍFICAS

| **Dominio** | | **Variable** | **Descripción** |  | **Comentarios** | |
| --- | --- | --- | --- | --- | --- | --- |
| **Funcional** | **AIVD**s | Manejo de **dinero** | *Necesita ayuda per gestionar los* ***temas económicos*** *(banco, tiendas, restaurantes)?* | **Sí** | * Se considerará que **NO** necesita ayuda si es capaz de manejar el dinero para realizar la compra diaria, autonomía para gestiones bancarias básicas (sacar y/o ingresar dinero) o pagar la cuenta en un restaurante. | Se escogieron éstas tres actividades instrumentales de la vida diaria dado que probablemente son las 3 AIVDs más universales (no condicionadas por diferencias culturales por género). |
| No |
| Utilización del **teléfono** | *Necesita ayuda para utilizar de manera autónoma el* ***teléfono****?* | **Sí** | * Se considerará que **NO** necesita ayuda si utiliza el teléfono por iniciativa propia y/o es capaz de marcar correctamente algunos números de familiares cercanos y/o si contesta adecuadamente el teléfono. |
| No |
|  |  |  |  |
|  |  | Control de **medicación** | *Necesita ayuda para* ***prepararse/administrarse*** *la* ***medicación****?* | **Sí** | *Si le preparan la medicación con *Blister* (aunque se la autoadministren), se considerará que **SÍ** necesita ayuda.  *Si no toma ningún tipo medicación, se considerará que **NO** necesita ayuda |  |
| No |
| **ABVD**s | **Índice de Barthel** (IB) | *No dependencia (****IB ≥ 95****) ?* |  | * Se utiliza el **Índice de Barthel** (Anexo 2.2), categorizándose según los criterios de Saha: no dependencia (IB ≥ 95: 0 puntos), dependencia leve (IB 90-65: 1 punto), dependencia moderada-grave (IB 25-60: 2 puntos), dependencia absoluta (IB ≤ 20: 3 puntos). | |
| *Dependencia leve-moderada (****IB 90-65****) ?* |  |
| *Dependencia moderada-grave (****IB******60-25****) ?* |  |
| *Dependencia absoluta (****IB ≤20****)?* |  |

| **Nutricional** | **Malnutrición** | *Ha perdido* ***≥ 5%*** *de peso en los últimos* ***6 meses****?* | **Sí** | * No es imprescindible objetivar esta pérdida. Es suficiente realizar una **aproximación a partir de la anamnesis** *(¿cuánto pesaba hace medio año?)* o bien a partir de la  **percepción subjetiva** del paciente y/o familiares *(por ejemplo: “ha perdido 1-2 tallas en la ropa”, “se ha adelgazado mucho”, “se ha fundido”...)* |
| --- | --- | --- | --- | --- |
| No |
| **Cognitivo** | Grado de **deterioro cognitivo** | *Ausencia de deterioro cognitivo?* | | ***** Se categoriza en 3 apartados a través de la **Globation Deterioration Scale** (GDS) de Reisberg (Anexo 2.3) en: ausencia de deterioro cognitivo (0 puntos), deterioro cognitivo leve / moderado (equivalente a GDS≤5: 1 punto) o deterioro cognitivo grave / muy grave (equivalente a un GDS≥6: 2 puntos). |
| *Det. cognitivo leve-moderado (equivalente a* ***GDS ≤5****)?* | |
| *Det. cognitivo grave-muy grave (equivalente a* ***GDS ≥ 6****)?* | |
| **Emocional** | **Síndrome depresiva** | *Necesita de* ***medicación antidepresiva****?* | **Sí** | * Se considerará que **SÍ** la necesita en caso de diagnóstico establecido de sd. depresiva o otra patología de la esfera emocional (Trastorno Bipolar,...) que requiera de tratamiento específico con *ISRS (Fluoxetina, paroxetina, Sertralina, Citalopram, Fluvoxamina,...)*, ISRSNA *(Venlafaxina, Duloxetina,...),* ADT *(Amitriptilina, Nortriptilina,...)*, IMAOs o coadyuvantes *(Litio,...)* |
| No |
| **Insomnio/ansiedad** | *Necesita tratamiento habitual con* ***benzodiacepinas*** *y/o* ***otros psicofármacos****de perfil sedante para el insomnio/ansiedad?* | **Sí** | * Se considerará que **SÍ** lo necesita en caso de insomnio o ansiedad que requiera de tratamiento específico con Benzodiacepinas *(Lorazepam, Alprazolam, Diazepam,...)*, hipnóticos (Clometiazol, Zolpidem,...), antidepresivos de perfil sedante (Trazodona,  Mirtazapina,...) u otros fármacos con este objetivo (antihistamínicos de perfil sedante *–*  *hidroxizina-*,...) |
| No |
| **Social** | **Vulnerabilidad social** | *Existe* ***percepción*** *por parte de los profesionales de situación de* ***vulnerabilidad social*** *?* | **Sí** | - **A criterio de los profesionales** que valoran al paciente. Se consideraran situaciones como las siguientes: Persona/as que vive/n “peligrosamente sola/s” – con condiciones de higiene personal inadecuadas o deficientes- y/o con familia con capacidad limitada de soporte y/o con dificultad para asumir la responsabilidad de atención al enfermo.   Relaciones familiares conflictivas. Falta de recursos económicos.   - Si el paciente está **institucionalizado /vive en Residencia**, se considerará que **NO** hay una situación de vulnerabilidad social. |
| No |
| **Síndromes**  **Geriátricas** | **Síndrome confusional** | *En los últimos 6 meses, ha presentado síndrome confusional y/o trastorno de comportamiento, que haya requerido de* ***neurolépticos****?* | **Sí** | - Se considerará que **SÍ** si actualmente -o en algún momento a lo largo de los últimos 6 meses- ha requerido de pauta fija de neurolépticos típicos *(haloperidol,..)* o atípicos *(Risperidona, Quetiapina,...)*. No incluye medicación condicional que no se haya tenido que administrar. - En el caso de síndrome confusional mixto/hipoactivo que no haya requerido de tratamiento se puede considerar como déficit (**SÍ**) si el diagnóstico es claro utilizando una escala validada (CAM,...). |
| No |
| **Caídas** | *En los últimos 6 meses, ha presentado* ***≥2 caídas*** *o alguna caída que haya requerido* ***hospitalización****?* | Sí | * Incluye tanto caídas relacionadas con **factores** *extrínsecos (tropezar con una alfombre, accidentes, ... )* como **intrínsecos** (síncopes, fracturas patológicas,...).  *El concepto de “Hospitalización” incluye el ingreso a Hospital *(>24 horas)* para cualquier tipo de fractura y/o etiología subyacente que haya precipitado las caídas *(arritmia cardíaca, trombosis pulmonar,...)* |
| No |
| **Úlceras** |  | **Sí** | * Incluye cualquier tipo de úlcera: por decúbito, venosa, arterial, tumoral, traumática,... |

|  |  | *Presenta alguna* ***úlcera*** *(por decúbito o vascular, de cualquier grado?* | No | * Incluye cualquier grado: I, II, III, IV |
| --- | --- | --- | --- | --- |
|  | **Polifarmacia** | *Habitualmente, toma* ***≥ 5 fármacos*** *? (no incluye fármacos condicionales)* | **Sí** | - Hace referencia a **cualquier tipo de fármaco**, incluidos broncodilatadores, colirios y parches percutáneos. - Las asociaciones de principio activos en un mismo comprimido (per ejemplo: Enalapril + Hidroclorotiazoida) hay que compatibilizarlos como fármacos distintos. - Los fármacos condicionales no contabilizan. |
|  | No |
|  | **Disfagia** | *Se* ***atraganta habitualmente*** *cuando come o beve? y/o En los últimos 6 meses, ha presentado alguna* ***infección respiratoria*** *por broncoaspiración?* | **Sí** | - La aproximación diagnóstica puede ser por **anamnesis** con paciente y/o familiares y/outilizando un **test específico** *(volumen-viscosidad, videofluroscopia,...)* - Se considerará que **NO** presenta disfagia si no presenta semiología sugestiva con las medidas antidisfagia habituales *(líquidos con espesantes, dieta triturada,...)* ni microaspiraciones asociadas. - En cambio, en caso de necesidad de Sonda Nasogàstrica o PEG se considerará que **SÍ** presenta disfagia |
|  | No |
|  | **Dolor** | *Requiere de* ***≥ 2 analgésicos convencionales*** *y/o* ***opiáceos mayores*** *para el control del dolor?* | **Sí** | - Se consideran como “**analgésicos convencionales**”: *paracetamol, cualquier AINE, Dipirona* y opioides menores *(Tramadol, Codeïna,...)* - **Opiáceos mayores**: Morfina, Fentanil, Oxicodona, metadona, Hidromorfona, Tapentadol,.... |
|  | No |
| **Síntomas graves** |
| **Disnea** | *La disnea basal le* ***impide salir de casa*** *y/o requiere de* ***opiáceos*** *habitualmente?* | **Sí** | - Presenta **disnea de reposo o a pequeños esfuerzos** que limitan su autonomía (hasta el punto de mantenerlo confinado a su domicilio); *incluye también aquellas personas que si salen de casa es con ayuda ámplia (Silla de ruedas no autopropulsada)* - Los **Opiáceos mayores** (Morfina, Fentanil, ...) han estado pautados específicamente con objetivo de control de la disnea |
| No |
|  |
|  |
| **Enfermedades *** | **Cáncer** | *Tiene algún tipo de* ***enfermedad oncológica activa****?* | **Sí** | - Incluye cualquier tipo de Cáncer: sólido, hematológico o cutáneo. - No se incluyen lesiones pre-malignas (adenoma vellosos, displasias epiteliales, ...) ni enfermedades oncológicas ya curadas / sin criterio de recidiva |
| No |
| **Respiratorias** | *Tiene algún tipo de* ***enfermedad respiratoria crónica*** *(MPOC, pneumopatía restrictiva,...)?* | **Sí** | * Incluye cualquier tipo de enfermedad respiratoria crónica, sea obstructiva (Bronquitis crónica, enfisema pulmonar, asma crónico,...), restrictiva pulmonar o extrapulmonar (fibrosis pulmonar, cifosis grave,...) o mixta. |
| No |
| **Cardíacas** | *Tiene algún tipo de* ***enfermedad cardíaca crónica*** *(Insuficiencia cardíaca, cardiopatía isquémica, arritmia)?* | **Sí** | * Incluye cualquier tipo de enfermedad cardíaca crónica, ya sea insuficiencia cardíaca  (sistólica o diastólica), cardiopatía isquémica o arritmia cardíaca (ACxFA, flutter, Bloqueos  AV,...) |
| No |
| **Neurológicas** | *Tiene algún tipo de* ***enfermedad neurodegenerativa*** *(Enfermedad de Parkinson, ELA, ,...) o* ***antecedente de accidente vascular cerebral*** *(isquémico o hemorrágico)?* | **Sí** | - Incluye cualquier tipo de enfermedad neurodegenerativa (Enfermedad de Parkinson,   ELA, PSP,...), pero NO las demencias neurodegenerativas (ya evaluadas en el apartado de “demencia”)   - Incluye cualquier tipo de antecedente de AVC de cualquier grado y origen |
| No |
| **Digestivo** | *Tiene algún tipo de* ***enfermedad digestiva crónica*** *(hepatopatía crónica, cirrosis, pancreatitis crónica, enfermedad inflamatoria intestinal,…)?* | **Sí** | * Incluye cualquier tipo de enfermedad digestiva o hepática crónica |
| No |
|  | **Renales** | *Tiene* ***insuficiencia renal crónica (FG < 60)****?* | **Sí** | * Se considerará que **SÍ** presenta insuficiencia renal crónica siempre que el FG sea < 60 en situación basal (se excluye situaciones de insuficiencia renal aguda)y/o necesidad de Tratamiento Substitutivo renal crónico (hemodiálisis o diálisis peritoneal). |
|  | No |
|  |  | | | |

* *En caso de constatar* ***criterios de enfermedad crónica avanzada*** *(oncológica, respiratoria, cardiovascular, neurológica, hepática, renal) incluidas en el test NECPAL Anexo 2.1)) se adjudican 2 puntos y no 1.*

# PUNTUACIÓN Y VALORACIÓN DE LOS RESULTADOS

# El IF-VIG está formado por 22 preguntas dicotómicas, para valorar 25 déficits. Por lo tanto, el resultado final se obtiene dividiendo por 25 (nombre de déficits acumulables) la puntuación obtenida para un paciente concreto (nombre de déficits acumulados).

- - - Con el objetivo de facilitar la comprensión del grado de fragilidad se propone categorizar el grado de fragilidad en los siguientes puntos de corte:

| **IF-VIG** | **Categorización** |
| --- | --- |
| **<0,20** | Ausencia de fragilidad / pre-fragilidad |
| **0,20-0,35** | Fragilidad inicial |
| **0.36-0,50** | Fragilidad intermedia |
| **>0,50** | Fragilidad avanzada |

**ANNEXO 2.1 Criterios de Enfermedad avanzada NECPAL**

#
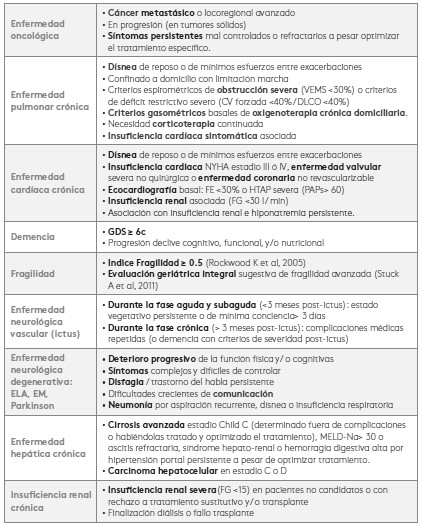


## **Annexo 2.2: Índice de Barthel**

| **ALIMENTACIÓN** | |
| --- | --- |
| **10** | **Independiente**; capaz de utilizar cualquier instrumento si es necesario; come en un tiempo razonable |
| **5** | **Necesita ayuda**; por ejemplo, para cortar la comida, poner la mantequilla... |
| **0** | **Dependiente**; necesita ser alimentado |
| **HIGIENE** | |
| **10** | Es capaz de **bañarse / ducharse solo** |
| **5** | No es capaz de bañarse, pero si **peinarse, lavarse la cara, afeitar-se**,... |
| **0** | **Dependiente**; necesita ayuda para la higiene |
| **VESTIR** | |
| **10** | Capaz de **ponerse y quitarse la ropa**, atarse los zapatos, abrocharse los botones y ponerse otros complementos que necesite (por ejemplo, el braguero, la cotilla, etc.) **sin ayuda**. |
| **5** | Realiza solo al menos **la mitad de tareas** en un tiempo razonable. |
| **0** | **Dependiente**; necesita que lo vistan. |
| **MICCIÓ** | |
| **10** | **Ningún episodio de incontinencia**. Capaz de utilizar cualquier dispositivo. Si está sondado, incluye cambiar la bolsa. |
| **5** | **Máximo uno en 24 horas**, incluye necesidad de ayuda en la manipulación de sondas o dispositivos. |
| **0** | **Incontinente** urinario |
| **DEPOSICIÓN** | |
| **10** | **Ningún episodio de incontinencia**. Si necesita enema o supositorio, es capaz de administrárselo él |
| **5** | **Accidente ocasional**, menos de una vez por semana o necesita ayuda para enemas o supositorios. |
| **0** | **Incontinente** fecal |
| **IR AL BAÑO** | |
| **10** | **Entra y sale sólo**. Capaz de ponerse y sacarse la ropa, limpiarse, y tirar de la cadena. Capaz de sentarse y levantarse de la taza del baño sin ayuda (puede utilizar barras para apoyarse). |
| **5** | Capaz de espabilarse con una **pequeña ayuda**, quitarse y ponerse la ropa, pero no se puede limpiar solo. |
| **0** | **Incapaz** sin más asistencia |
| **TRANSFERENCIAS** | |
| **15** | **Sin ayuda** en todas las fases. Es autónomo con la silla de ruedas, si la requiere. |
| **10** | Incluye **supervisión verbal o pequeña ayuda física**. |
| **5** | Puede sentarse, pero requiere de **bastante ayuda**. |
| **0** | **Encamado**; si utiliza silla de ruedas, necesita que alguien le lleve. |
| **DEAMBULACIÓN** | |
| **15** | Puede andar **> 50 m sin ayuda o supervisión**. Puede utilizar ayuda (bastones, muletas) excepto andador. |
| **10** | **Supervisión o pequeña ayuda física para andar 50 m**. Incluye ayudas para estar de pie (andador). |
| **5** | **Independiente** en **silla de ruedas** (se desplaza 50 m, atraviesa por la puerta y gira sólo. |
| **0** | **Deambula < 50 m**. Si utiliza silla de ruedas, necesita que alguien le lleve. |
| **ESCALERAS** | |
| **10** | Es capaz de **subir y bajar un piso sin ayuda**, ni sistemas de soporte ni supervisión. |
| **5** | Requiere **supervisión física o verbal.** |
| **0** | **Incapaz de subir peldaños**. Necesita ascensor o silla/asienta sube-escaleras |
|  | **ÍNDICE de BARTHEL** (X/100) |

## **Annexo 2.3:** Global Deterioration Scale (GDS) de Reisberg

|  | | **ESTADIO GDS** | **FASE CLÍNICA** | **CARACTERÍSTICAS** | | | --- | --- | --- | --- | | **GDS 3.**  DC leve | Det. leve  MEC: 20-27 | Déficit en **tareas ocupacionales y sociales complejas**. Generalmente lo constatan familiares y amigos | | | **GDS 4.**  DC moderado | Alzheimer leve MEC: 16-23 | Déficits observables en **tareas complejas**, como el control de los aspectos económicos, personales o planificación | | | **GDS 5.**  DC moderadamente  grave | Alzheimer moderada MEC: 10-19 | Disminución de la habilidad en escoger la ropa adecuada a cada estación del año y resto de **actividades instrumentales** | | | **GDS 6.**  DC grave | Alzheimer moderadamente grave MEC: 0-12 | **a** | disminución de la habilidad para **vestirse** | | **b** | disminución de la habilidad para **bañarse** | | **c** | disminución de la habilidad para **asearse y arreglarse** solo | | **d** | disminución de la **continencia urinaria** | | **e** | disminución de la **continencia fecal** | | **GDS 7.**  DC muy grave | Alzheimer grave MEC: 0 | **a** | capacidad de habla limitada aprox. a **6 palabras** | | **b** | capacidad de habla limitada a **una palabra** | | **c** | Pérdida de la capacidad para **andar** sin ayuda | | **d** | pérdida de la capacidad para **sentarse y levantarse** sin ayuda | | **e** | Pérdida de la capacidad para **sonreír** | | **f** | Pérdida de la capacidad para **mantener la cabeza erguida** | |
| --- | --- | --- | --- | --- | --- | --- | --- | --- | --- | --- | --- | --- | --- | --- | --- | --- | --- | --- | --- | --- | --- | --- | --- | --- | --- | --- | --- | --- | --- | --- | --- | --- | --- | --- | --- | --- | --- | --- | --- | --- | --- | --- | --- |

**ANNEXO 3: Criterios para la identificación de PCC**

No hay un instrumento específico para el cribage poblacional de pacientes crónicos complejos (PCC). La identificación se fundamenta en la presencia de criterios —basados en el consenso de expertos y los resultados de estudios epidemiológicos previos—, en alguna de las tres dimensiones de la complejidad, que se resumen a la tabla siguiente.

| Problemas relacionados con la **situación clínica** de la persona | - **Multimorbilidad.** Patología crónica **única grave o progresiva.** - Enfermedades minoritarias. - **Evolución dinámica.** - Aparición de **síndromes geriátricos** con criterios de gravedad/ progresión (polifarmacia, deterioro cognitivo, fragilidad…). - **Síntomas persistentes** intensos y refractarios - **Alta utilitzación de servicios** o consumo de recursos. - Alta probabilidad de sufrir descompensaciones. - Classificación dentro del **grupo del 5% de más riesgo según el grupo de morbilidad agrupada.** |
| --- | --- |
| Criterios del **ámbito social/ contextual** | **Situación social de riesgo o disfuncional** para atender las necesidades s aen una o más de las áreas siguientes:   - Organización de los cuidados. - Unidad familiar y/o entorno cuidador. - Cohesión familiar y clima afectivo. - Condiciones estructurales, seguridad, confort o privacidad. - Red relacional y de entorno. |
| Relacionados | - **Beneficio de gestió multidisciplin**a**ria**. Necesidad de acceso a diferentes dispositivos. |
| **con profesionales y sistema asistencial** | - **Incertidumbre en las decisiones y dudas en la gestión**. Discrepancias entre diferentes profesionales o equipos en su gestión clínica. - Beneficio de **estrategias de atención integrada**. |

**No hay ninguna pauta inequívoca s**obre cuántos o qué criterios o la combinación de estos hay que cumplir para ser considerado un PCC. Hay que cumplir suficientes criterios porque el profesional referente considere que la gestión del caso es especialmente difícil, y, por lo tanto, valide de forma clínica e identifique, de acuerdo con la persona, que es un PCC. Una persona que no tenga ninguno de estos criterios es realmente difícil que pueda presentar necesidades complejas de atención.

**ANNEXO 4: Criterios para la identificación de MACA**

En Catalunya, para la identificación precoz o el cribado a de personas con cronicidad avanzada y necesidades paliativas (MACA) se utiliza el instrumento NECPAL CCOMS-ICO©. Este instrumento se basa en la respuesta negativa (“no me sorprendería”) a la **pregunta sorpresa** “¿Os sorprendería que esta persona muriera a lo largo del próximo año?”, **asociada** a la detección de criterios de necesidades paliativas, pérdida funcional y/o nutricional, multimorbilidad, uso de recursos y/o criterios de gravedad y progresión de enfermedades avanzadas (en la figura se puede ver la versión 4.0 del instrumento NECPAL CCOMS-ICO©).

Versión 4.0 del instrumento NECPAL.

Fuente: Cátedra de Curas Paliativas UVic-UCC


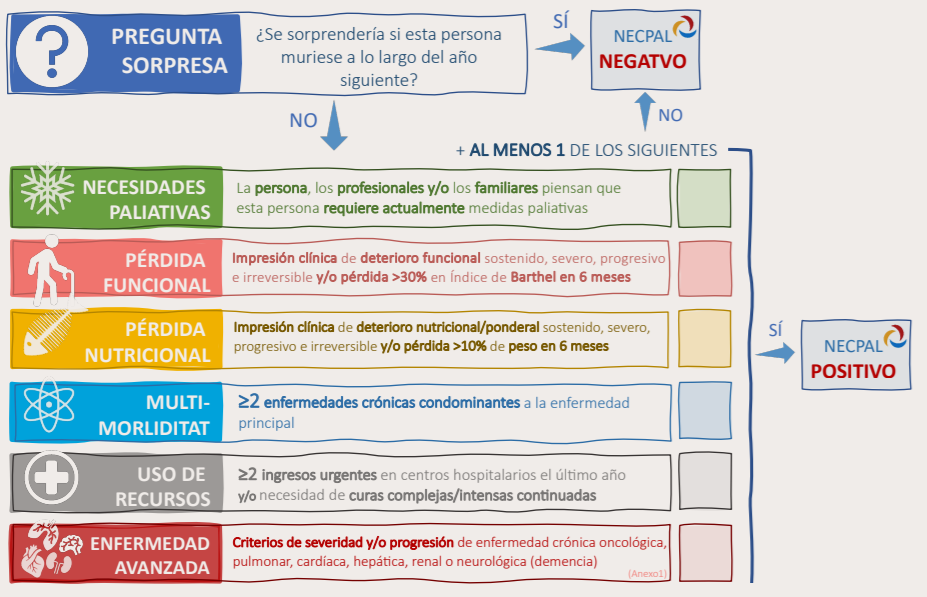


La versión 4.0 del NECPAL permite distinguir entre diferentes grados de afectación de las personas con cronicidad avanzada y necesidades paliativas, en base al número de criterios acumulados. Basado en el mismo concepto de acumulación de déficits de los índices de fragilidad, existe una relación directamente proporcional entre el número de criterios positivos y el pronóstico de mortalidad de la persona.

**El resultado de este procedimiento nos sitúa cada paciente MACA en alguno de los 3 estadios pronósticos:**

- Estadio I: pregunta sorpresa positiva y 1-2 parámetros 🡪 Media de supervivencia: 38 meses
- Estadio II: pregunta sorpresa positiva y 3-4 parámetros 🡪 Media de supervivencia: 17.2 meses
- Estadio III: pregunta sorpresa positiva y 5-6 parámetros 🡪 Media de supervivencia: 3.6 meses
